# Supplementary material for: ‘Learning to shape life’ – a qualitative study on the challenges posed by a diagnosis of diabetes mellitus type 2
Source: PubMed Central journal article supplement (PMC6346523; doi:10.1186/s12939-019-0924-3), 2019-01-24

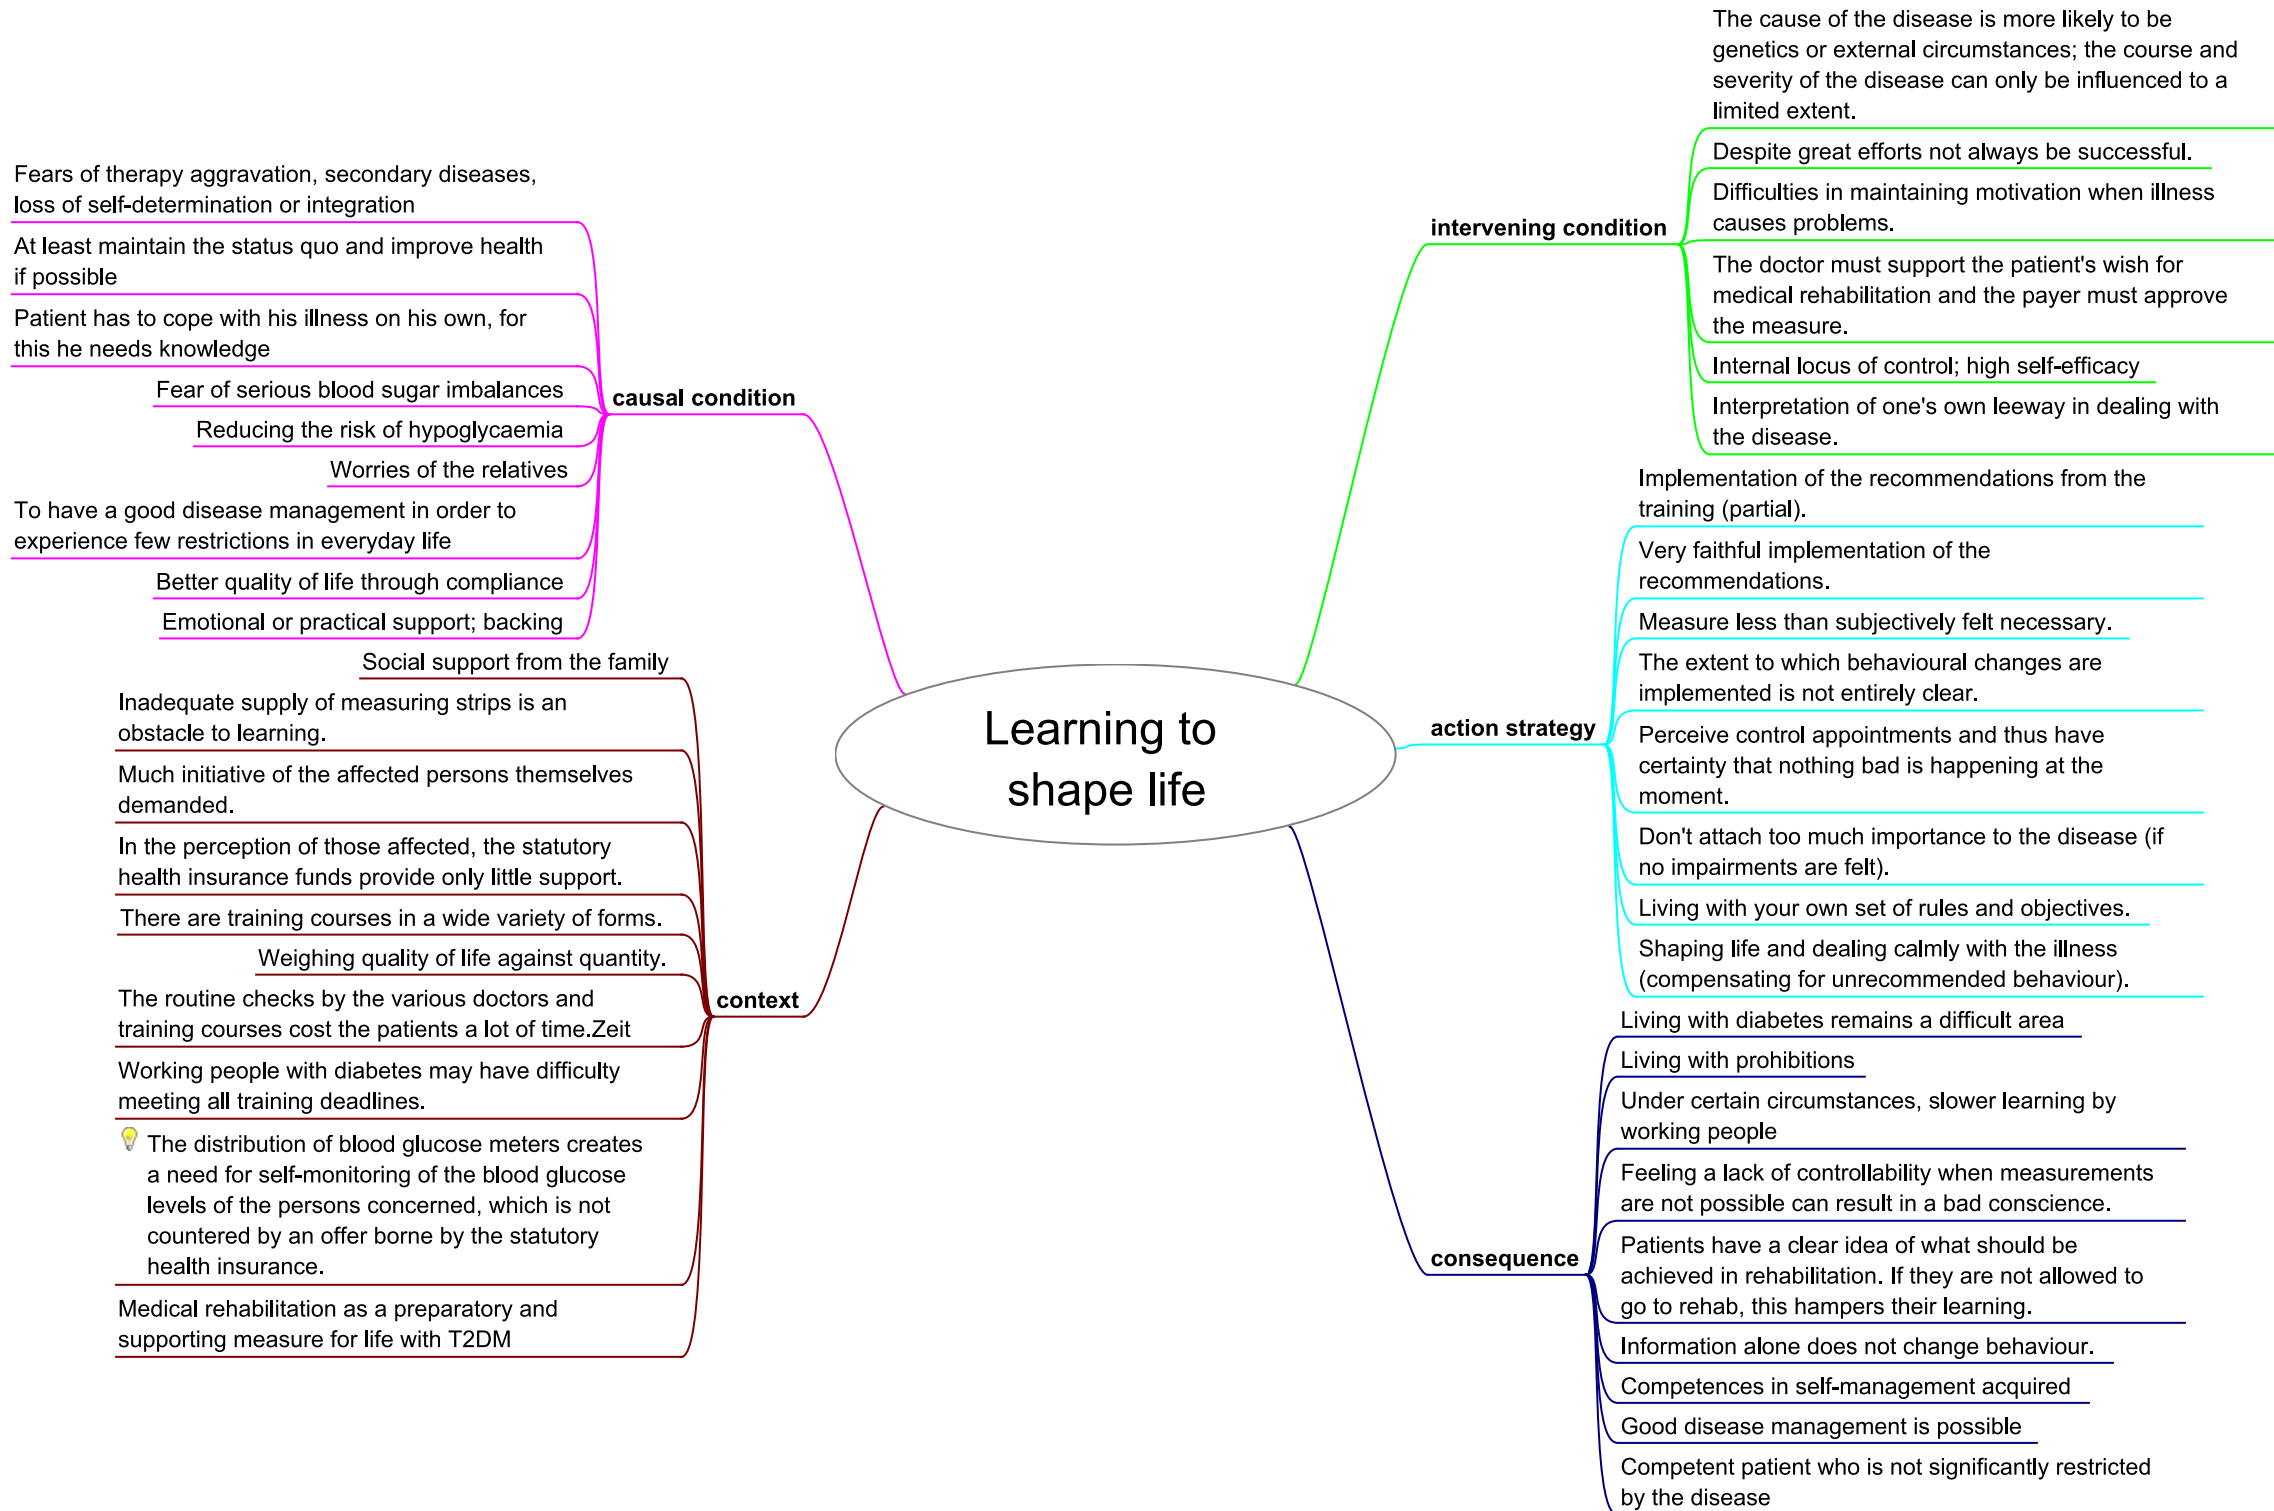

Supplement: 12939_2019_924_MOESM1_ESM.pdf [file 12939_2019_924_MOESM1_ESM.pdf]
